# 1 **Toxin breakdown does not preclude the potential for defensive toxin use in a fruit fly**

2 Tyler E. Douglas<sup>1\*</sup>, Sofia G. Beskid<sup>1,2,+</sup>, Callie E. Gernand<sup>3,+</sup>, Brianna E. Nirtaut<sup>3,+</sup>, Kristen E.  
3 Tamsil<sup>1,+</sup>, Richard W. Fitch<sup>3</sup>, and Rebecca D. Tarvin<sup>1\*</sup>

4 <sup>1</sup> Museum of Vertebrate Zoology and Department of Integrative Biology, University of  
5 California Berkeley, Berkeley, CA 94720

6 <sup>2</sup> Department of Integrative Biology, University of Texas at Austin, Austin, TX, 78712

7 <sup>3</sup> Department of Chemistry and Physics, Indiana State University, Terre Haute, IN 47809

8 + Authors listed in alphabetical order

9  
10 \*Corresponding authors:

11 Tyler Douglas (tyler.douglas@berkeley.edu)

12 Rebecca Tarvin (rdtarvin@berkeley.edu)

13 Phone: 510 642 0308

14 3101 Valley Life Sciences Building

15 Berkeley, CA, 94720

16

## 17 **Abstract**

18 Animals that ingest toxins can themselves become toxic or unpalatable to predators and  
19 parasites. Because most animals rapidly eliminate toxins to survive toxin ingestion, it is unclear  
20 how species transition from susceptibility and toxin elimination to tolerance and accumulation as  
21 chemical defense emerges. Studies of chemical defense have generally focused on species that  
22 display active toxin sequestration and target-site insensitivity mutations that permit survival  
23 without necessitating toxin metabolism. Here we investigate whether animals that presumably  
24 rely on toxin elimination for survival can also utilize ingested toxins for defense. We use the A4  
25 and A3 *Drosophila melanogaster* fly strains from the *Drosophila* Synthetic Population Resource  
26 (DSPR), which respectively possess elevated and reduced metabolic resistance to nicotine. We  
27 find that ingesting nicotine increased the survival of A4 but not of A3 flies against *Leptopilina*  
28 *heterotoma* wasp parasitism. Further, we find that despite possessing enhanced toxin clearance  
29 mechanisms, A4 flies accrued more nicotine than A3 individuals. Our results suggest that  
30 enhanced metabolic detoxification can allow for greater toxin intake by offsetting the cost of  
31 toxin ingestion. Passive toxin accumulation that accompanies increased toxin intake may  
32 underlie the early origins of chemical defense.

33 **Keywords:** xenobiotic metabolism, chemical defense, multi-trophic selection, bioaccumulation,  
34 enemy-free space

35 **Word count:** 2504

36

37

38

39

## 40 Introduction

41 Most animals survive toxin ingestion by eliminating toxins through metabolic  
42 detoxification (1–3). Chemically defended animals subvert this paradigm by accumulating rather  
43 than eliminating toxins to deter predators or parasites (4). Given that pre-existing metabolic  
44 resistance mechanisms may preclude toxin accumulation, it is unclear how organisms transition  
45 from toxin elimination to accumulation. An important step appears to be evolving non-metabolic  
46 modes of resistance such as target-site insensitivity (TSI), which confer resistance without  
47 deactivating toxins (5). Animals with TSI often also evolve toxin-specific sequestration  
48 mechanisms that actively shuttle ingested toxins into storage tissues, driving further increases in  
49 TSI (6, 7). Because TSI acts on a narrow range of toxins, it may evolve through recurrent, long-  
50 term exposure to a single class of toxin (8, 9). Thus, if non-metabolic resistance is required to  
51 facilitate the switch from toxin elimination to accumulation, chemical defense evolution may be  
52 limited to species that specialize on particular toxic food sources. However, species lacking  
53 active sequestration or non-metabolic resistance may still acquire transient chemical defense  
54 through passive accumulation of dietary toxins so long as toxin consumption outpaces  
55 elimination. If so, then animals that consume toxins and survive may receive an advantage in the  
56 face of predation or parasitism, potentially leading to chemical defense.

57 Here we test whether an animal can passively accumulate a defensive level of toxin while  
58 simultaneously offsetting its cost through metabolic detoxification using *Drosophila* Synthetic  
59 Population Resource (DSPR) *Drosophila melanogaster* A4 and A3 fly strains (Bloomington  
60 stocks 3852 and 3844) and the parasitoid wasp *Leptopilina heterotoma*. The A3 and A4 strains  
61 are two of fifteen founder lines used to establish the DSPR, a panel of recombinant inbred lines  
62 that captures global *D. melanogaster* genetic diversity (10). The A4 fly strain harbors genetic  
63 variation in enzymes that increase its metabolic resistance to nicotine relative to A3; previous  
64 Quantitative Trait Locus (QTL) studies have not reported evidence for TSI in A3 or A4 (11, 12).  
65 Here, we tested whether nicotine consumption can increase fly survival against wasp parasitism.  
66 We found that nicotine ingestion increases A4 but not A3 survival, and that, surprisingly,  
67 nicotine-resistant A4 flies accumulate more toxin than nicotine-sensitive A3 flies. Thus, our  
68 findings indicate that, paradoxically, increased metabolic resistance may be a first step towards  
69 the evolution of chemical defense by reducing the cost of toxin consumption and thereby  
70 allowing for accumulation of a higher internal toxin load.

## 71 Results and Discussion

72 The A4 and A3 DSPR founder lines are respectively characterized by nicotine-resistant  
73 and nicotine-sensitive phenotypes (13). We quantified their resistance by measuring the  
74 proportion of second-instar larvae surviving to adulthood when reared on media containing 0  
75 mM to 5.0 mM nicotine, then estimating the median lethal concentration (LC50) for each strain  
76 (Fig. 1). Because A4 flies had low viability in general (this was consistent between experiments),  
77 to compare LC50 between strains we normalized percent survival by the maximum survival of  
78 each line on control food (see supporting data for non-normalized values; reported values from  
79 subsequent experiments are uncorrected values). The A4 LC50 was nearly twice that of A3  
80 ( $LC50_{A4} = 1.9 \pm 0.3$  mM,  $LC50_{A3} = 1.1 \pm 0.2$  mM; Fig. 1). While A3 survival decreased

81 significantly at the lowest nicotine dose administered (0.5 mM), A4 survival was not  
82 significantly impacted until 1.75 mM. We proceeded to use an intermediate level of 1.25-mM  
83 nicotine for subsequent experiments.

84 We next assessed whether ingesting 1.25-mM nicotine after parasitism by *Leptopilina*  
85 *heterotoma* increased *D. melanogaster* survival. *Leptopilina heterotoma* is a highly virulent  
86 parasitoid wasp that oviposits into the hemocoel of developing fly larvae, and successful wasp  
87 development is lethal to larval hosts. Although *L. heterotoma* actively suppresses the drosophilid  
88 defensive immune response against endoparasites (14), developing parasites are exposed to host  
89 hemolymph and, presumably, to circulating toxins consumed by fly larvae. In the no-nicotine +  
90 wasp treatment,  $2.8\% \pm 2.7\%$  (mean  $\pm$  SD) of second-instar A4 larvae survived to adulthood,  
91 while in the nicotine + wasp treatment A4 survival increased significantly to  $6.8 \pm 4.4\%$  ( $p =$   
92  $0.03$ ,  $Z = -2.2$ ; Fig. 2A). Correspondingly, *L. heterotoma* survival decreased five-fold from  $37\%$   
93  $\pm 5\%$  to  $6.4\% \pm 6.8\%$  ( $p < 0.0001$ ,  $Z = 7.0$ ; Fig. 2B). Thus, nicotine consumption provided A4  
94 flies with a toxin-mediated fitness advantage.

95 In contrast, the survival of parasitized, nicotine-fed A3 larvae ( $15 \pm 4.4\%$ ) was not higher  
96 than parasitized larvae on control food ( $19 \pm 10\%$ ;  $p = 0.36$ ,  $Z = 0.92$ ; Fig. 2A). However, wasp  
97 survival on A3 flies halved from  $41 \pm 15\%$  to  $21 \pm 9.3\%$  when A3 flies consumed nicotine ( $p =$   
98  $0.0001$ ,  $Z = 4$ ). This pattern suggests that nicotine consumption could have partially alleviated  
99 A3 parasitism-induced mortality in the nicotine + wasp treatment. Indeed, in non-parasitized  
100 treatments, nicotine consumption decreased A3 survival by 44% ( $p < 0.0001$ ,  $Z = 7.6$ ), while in  
101 the parasitized treatments, nicotine consumption decreased A3 survival by only 3.5%. The  
102 comparatively insignificant decrease in survival for parasitized A3 that were fed control versus  
103 nicotine media, as well as corresponding decrease in wasp survival when A3 flies were fed  
104 nicotine, suggests that nicotine may have partially offset parasitism-induced mortality but failed  
105 to increase net A3 survival.

106 To verify that flies contained nicotine, we quantified nicotine in nicotine-fed A4 and A3  
107 larvae. After ~24hr on nicotine media, third-instar A4 larvae accumulated significantly more  
108 nicotine than A3 larvae ( $9.3 \pm 4.6$  ng vs.  $3.3 \pm 1.4$  ng nicotine per individual,  $p = 0.021$ ,  $W = 1$ ;  
109 Fig. 2C). The greater amount of nicotine in A4 flies likely underlies the steeper decline in wasp  
110 survival observed on A4 nicotine-fed larvae relative to A3 (Fig. 2B). Nicotine levels increased  
111 throughout development in both fly strains and persisted through metamorphosis (also observed  
112 in fruit flies fed ouabain (15)), suggesting that nicotine persisted after the meconium was shed  
113 and may provide a survival advantage into adulthood. Our finding that A4 flies accumulated  
114 more nicotine than A3 contrasted with expectations, as A4 flies are known to exhibit elevated  
115 copy number and expression of multiple cytochrome p450s, as well as a structural mutation in a  
116 UDP-glucuronosyltransferase (UGT) gene, both of which should increase A4 nicotine  
117 metabolism relative to A3 (12, 16). We also found that A3 flies exhibit higher ratios of cotinine,  
118 a metabolic by-product of nicotine, across all stages compared to A4 flies (although non-  
119 significantly in larvae and pupae), which is unexpected given what is known about A4  
120 metabolism (Fig. 2D). Although UGT enzymes may be converting nicotine into other  
121 metabolites, the overall higher levels of nicotine in A4 flies suggest that A4 flies simply consume

122 more nicotine-containing food. A similar dynamic has been observed in the tobacco hornworm  
123 *Manduca sexta*, wherein increased expression of cytochrome p450s stimulate an increase in  
124 nicotine consumption (17). Thus, enhanced survival in nicotine-fed A4 flies may also be due to  
125 higher overall nutrient intake.

126 Given that nicotine consumption conferred *D. melanogaster* with a survival advantage in  
127 a lab setting, we propose that gaining chemical defenses through passive toxin accumulation may  
128 be a general phenomenon in organisms that consume toxins. Several drosophilids consume  
129 toxins in the wild: *Scaptomyza nigrata* specializes on glucosinolate (GLS)-producing plants (18),  
130 while *Drosophila mojavensis* specializes on isoquinoline alkaloids-producing cacti (19), and  
131 *Drosophila sechellia* is known to acquire chemical defense through consumption of toxic fatty  
132 acids produced by its host *Morinda citrifolia* (20). We note that the biochemical properties and  
133 metabolic context of each toxin should affect their propensity to bioaccumulate. For example,  
134 GLS rapidly breakdown into toxic mustard oils, and sequestration may require adaptations that  
135 interrupt this process (18). Other small-molecule toxins may escape metabolic processes to  
136 bioaccumulate. Many organisms sequester toxic steroids or alkaloids, suggesting that these may  
137 more readily incorporate into the cuticle or hemolymph (21, 22).

138 In conclusion, we find that *D. melanogaster* flies with higher metabolic nicotine  
139 resistance passively accumulate more nicotine than nicotine-sensitive flies and can leverage  
140 accumulated nicotine for chemical defense against endoparasites. Thus, an increase in metabolic  
141 resistance may be a first step in the evolution of chemical defense, as increased resistance can  
142 facilitate passive toxin accumulation and generate a toxin-mediated fitness advantage against  
143 natural enemies without active toxin sequestration mechanisms. It is possible that any  
144 sufficiently resistant insect could consume a toxin and receive a toxin-mediated advantage  
145 against susceptible natural enemies through passive toxin accumulation. Our results support  
146 previous arguments that natural selection from predators and parasites on passive toxin  
147 accumulation might have been the starting point for many taxa that are currently recognized as  
148 chemically defended (15, 23).

## 149 **Methods**

### 150 **Fly stocks**

151 A4 and A3 flies were maintained at room temperature on molasses media from the Fly Food  
152 Facility at UCB; survival and parasitism experiments used Ward's Instant *Drosophila* media to  
153 facilitate toxin dosing.

### 154 **Wasp stocks**

155 *Leptopilina heterotoma* were maintained at room temperature on W118 *D. melanogaster* and  
156 70%-honey water. Experiments used wasps within two weeks of eclosion. *L. heterotoma* was  
157 chosen as our focal species based on its high virulence and inhibition of melanin encapsulation in  
158 *D. melanogaster* (14).

### 159 **Generation of fly larvae**

160 Approximately one thousand flies were allowed to lay eggs for three days in three replicate  
161 resealable plastic containers with a layer of molasses-agar smeared with yeast paste. Larvae were  
162 then pooled from each container, and second instar larvae (L2) were selected based on  
163 morphology under a dissection microscope. Flies were not sorted by sex.

#### 164 **Nicotine resistance experiment**

165 Twenty L2 were transferred one-by-one from egg-laying chambers into 5 replicate vials  
166 containing the following nicotine concentrations: 0 mM, 0.5 mM, 1.25 mM, 1.75 mM, 2.25 mM,  
167 2.50 mM, 3.00 mM, 4.00 mM, 5.00 mM nicotine-treated media. Vials were checked daily for  
168 eclosed flies.

#### 169 **Parasitism experiment**

170 Four hundred A4/A3 L2 were transferred from egg-laying chambers into five resealable plastic  
171 containers containing molasses agar. Forty female and twenty male wasps were added to three  
172 containers ("wasp" treatment) while the other two along with a sixth container of eighty L2s  
173 were left unmanipulated ("no-wasp" treatment); all containers were left for 24hr. The L2s were  
174 then transferred one-by-one (to avoid batch bias) into forty vials containing either control or  
175 1.25-mM nicotine media. Vials were checked daily or every other day for pupation and adult fly  
176 and wasp emergence. The parasitism step occurred prior to nicotine treatment, in order to avoid  
177 exposing *L. heterotoma* adults to nicotine. Therefore, any changes in fly and wasp survival in  
178 this experiment reflect the effects of nicotine consumption by *D. melanogaster* larvae and not  
179 any behavioral change by *L. heterotoma*. This experiment was run twice with A4 flies and data  
180 was pooled across runs.

#### 181 **Nicotine accumulation experiment**

182 One thousand A4/A3 L2 were distributed one-by-one from egg-laying chambers into five 1.25-  
183 mM nicotine-treated vials. At five developmental stages (3<sup>rd</sup>-instar larvae, day-1 pupa, day-3  
184 pupae [A4 only], day-1 adult, day-3 adult), we collected five individuals and washed them  
185 individually in glass dissection wells with DI H<sub>2</sub>O. Pupae were removed from vials prior to  
186 eclosion to avoid contamination of the adult exoskeleton with nicotine. Individuals from each  
187 stage for each vial were pooled and frozen at -20°C. Our GC-MS data indicate that in A4 flies  
188 nicotine may have carried over between individuals during the wash step, as control samples  
189 show borderline detection of nicotine. However, these levels are low and suggest that cross  
190 contamination was insufficient to have influenced our conclusions. Moreover, because adult flies  
191 eclosed without physically contacting nicotine, we are confident that the signal detected in  
192 nicotine-fed flies represents genuine toxin accumulation.

#### 193 **GC-MS**

194 Frozen flies were thawed and soaked with methanol (50 µL) at room temperature for 48 hours.  
195 The crude methanolic extracts were transferred to limited volume autosampler vials and injected  
196 into a Thermo Trace GC, equipped with a Restek RTX-5MS 30 m x 0.25 mm capillary column  
197 0.5 µL with He carrier at 40 cm/s, temperature programmed at 100°C held 1 min, then a  
198 10°C/min ramp to 280°C and held 10 min. Samples (1 µL) were injected splitless at 250°C with

199 a closed time of 1 min and surge pressure of 200 kPa. The GC was interfaced to a Thermo iTQ  
200 ion-trap mass spectrometer with a 250°C EI source, 70 eV ionization and autotuned with  
201 perfluorotributylamine, using automatic gain control (max ion time 25 ms). A solvent delay of 3  
202 minutes was used. Nicotine di-dartrate (Sigma) standards were run before, midway through and  
203 at the end of test samples at log serial dilutions from 1.00 nM to 100 µM, eluting at 8.8 minutes  
204 and followed with blank methanol injections to avoid carryover. Integration analysis was done  
205 using extracted ion chromatograms at  $m/z$  84 for selectivity (detection limit estimated at 0.2 ng (3  
206  $\sigma$ ). The nicotine metabolite cotinine was identified by searching its mass spectrum and  
207 comparison with a known sample, eluting at 13.3 minutes. In the absence of quantitative  
208 standards for cotinine, we estimated relative rates of nicotine breakdown by ratioing the  
209 integrated area of cotinine at  $m/z$  98 vs nicotine at  $m/z$  84. Data were reviewed for but did not  
210 indicate presence of nicotine metabolites nor nicotine and myosmine. Two other possible  
211 metabolites were found but remain unidentified. One nicotine-fed A3 pupal sample contained an  
212 order of magnitude more nicotine than all other measurements from both fly strains.  
213 Contamination by nicotine-treated media was likely the source of this inflated measurement, as  
214 the sample contained an extreme surplus of nicotine only and not its corresponding metabolic by-  
215 product, cotinine. We therefore excluded this outlier sample from our analysis.

## 216 **Statistical Analysis**

217 Statistical analyses were conducted using Rv3.6.1 (24). LC50s were calculated using adapted  
218 version of the ‘dose.p’ function from the ‘MASS’ package (25) to a binomial regression model of  
219 normalized percent survival versus nicotine dose generated by the ‘glmer’ function from lme4.  
220 Fly and wasp survival were each compared by applying a least-squared means test to a binomial  
221 regression model of survival as a function of nicotine and (for flies) parasite treatments using the  
222 ‘glm’ function from the ‘lme4’ package. Mean nicotine content of flies was compared across fly  
223 strains using a Wilcoxon signed-rank tests in base R.

## 224 **Acknowledgements**

225 RDT and TED thank Noah Whiteman, Kirsten Verster, Jessica Aguilar, Mariana Karageorgi, and  
226 Max Lambert for input on the experimental design, Stuart Macdonald for DSPR lines, and Todd  
227 Schlenke for wasps. This research was supported by the Miller Institute for Basic Research in  
228 Science and University of California, Berkeley start-up funds to RDT and NSF funds to RWF  
229 (CCLI-DUE 0942345 and DEB 1556982).

## 230 **References**

- 231 1. P. J. Daborn, *et al.*, A Single P450 Allele Associated with Insecticide Resistance in  
232 *Drosophila*. *Science*. **297**, 2253–2256 (2002).
- 233 2. X. Li, M. R. Berenbaum, M. A. Schuler, Plant allelochemicals differentially regulate  
234 *Helicoverpa zea* cytochrome P450 genes. *Insect Mol. Biol.* **11**, 343–351 (2002).
- 235 3. P. Kumar, S. S. Pandit, A. Steppuhn, I. T. Baldwin, Natural history-driven, plant-mediated  
236 RNAi-based study reveals CYP6B46’s role in a nicotine-mediated antipredator herbivore  
237 defense. *Proc. Natl. Acad. Sci.* **111**, 1245–1252 (2014).

- 238 4. T. Hartmann, D. Ober, Biosynthesis and Metabolism of Pyrrolizidine Alkaloids in Plants  
239 and Specialized Insect Herbivores. 207–243 (2000).
- 240 5. S. Dobler, S. Dalla, V. Wagschal, A. A. Agrawal, Community-wide convergent evolution  
241 in insect adaptation to toxic cardenolides by substitutions in the Na,K-ATPase. *Proc. Natl.*  
242 *Acad. Sci. U. S. A.* **109**, 13040–13045 (2012).
- 243 6. G. Petschenka, A. A. Agrawal, Milkweed butterfly resistance to plant toxins is linked to  
244 sequestration, not coping with a toxic diet. *Proc. R. Soc. B Biol. Sci.* **282** (2015).
- 245 7. K. Arbuckle, R. C. Rodríguez de la Vega, N. R. Casewell, Coevolution takes the sting out  
246 of it: Evolutionary biology and mechanisms of toxin resistance in animals. *Toxicon* **140**  
247 (2017).
- 248 8. L. Després, J. P. David, C. Gallet, The evolutionary ecology of insect resistance to plant  
249 chemicals. *Trends Ecol. Evol.* **22**, 298–307 (2007).
- 250 9. R. H. Ffrench-Constant, P. J. Daborn, G. Le Goff, The genetics and genomics of  
251 insecticide resistance. *Trends Genet.* **20**, 163–170 (2004).
- 252 10. E. G. King, *et al.*, Genetic dissection of a model complex trait using the Drosophila  
253 Synthetic Population Resource. *Genome Res.* **22**, 1558–1566 (2012).
- 254 11. M. Chakraborty, J. J. Emerson, S. J. Macdonald, A. D. Long, Structural variants exhibit  
255 widespread allelic heterogeneity and shape variation in complex traits. *Nat. Commun.*  
256 *2019 101* **10**, 1–11 (2019).
- 257 12. S. J. Macdonald, C. A. Highfill, A naturally-occurring 22-bp coding deletion in Ugt86Dd  
258 reduces nicotine resistance in Drosophila melanogaster. *BMC Res. Notes 2020 131* **13**, 1–  
259 6 (2020).
- 260 13. T. N. Marriage, E. G. King, A. D. Long, S. J. Macdonald, Fine-Mapping Nicotine  
261 Resistance Loci in Drosophila Using a Multiparent Advanced Generation Inter-Cross  
262 Population. *Genetics* **198**, 45–57 (2014).
- 263 14. R. M. Rizki, T. M. Rizki, “Selective destruction of a host blood cell type by a parasitoid  
264 wasp” *Proc. Natl. Acad. Sci.* **81**, 6154-6158 (1984).
- 265 15. M. Karageorgi, *et al.*, Genome editing retraces the evolution of toxin resistance in the  
266 monarch butterfly. *Nature* **574**, 409-412 (2019)
- 267 16. C. A. Highfill, *et al.*, Naturally Segregating Variation at Ugt86Dd Contributes to Nicotine  
268 Resistance in Drosophila melanogaster. *Genetics* **207**, 311–325 (2017).
- 269 17. M. J. Snyder, J. I. Glendinning, Causal connection between detoxification enzyme activity  
270 and consumption of a toxic plant compound *J. Comp. Physiol. A* **179**, 255-261 (1996).
- 271 18. P. T. Humphrey, *et al.*, Aversion and attraction to harmful plant secondary compounds

- 272 jointly shape the foraging ecology of a specialist herbivore. *Ecol. Evol.* **6**, 3256–3268  
273 (2016).
- 274 19. J. C. Fogleman, Response of *Drosophila melanogaster* to selection for P450-mediated  
275 resistance to isoquinoline alkaloids. *Chem. Biol. Interact.* **125**, 93–105 (2000).
- 276 20. S.-J. L, W. B, Does *Drosophila sechellia* escape parasitoid attack by feeding on a toxic  
277 resource? *PeerJ* **9** (2021).
- 278 21. S. S. Duffey, Sequestration of plant natural products by insects. *Ann. Rev. Entomology* **25**,  
279 447-477 (1980).
- 280 22. C. T. Hanifin, The Chemical and Evolutionary Ecology of Tetrodotoxin (TTX) Toxicity in  
281 Terrestrial Vertebrates. *Mar. Drugs* 2010, Vol. 8, Pages 577-593 **8**, 577–593 (2010).
- 282 23. C. G. Jones, D. W. Whitman, S. J. Compton, P. J. Silk, M. S. Blum, Reduction in diet  
283 breadth results in sequestration of plant chemicals and increases efficacy of chemical  
284 defense in a generalist grasshopper *J. Chem. Ecol.* **15**, 1811-1821 (1989).
- 285 24. D. Bates, M. Mächler, B. Bolker, S. Walker, Fitting Linear Mixed-Effects Models Using  
286 lme4. *J. Stat. Softw.* **67**, 1–48 (2015).
- 287 25. Venables, W. N. & Ripley, B. D. (2002) Modern Applied Statistics with S. Fourth Edition.  
288



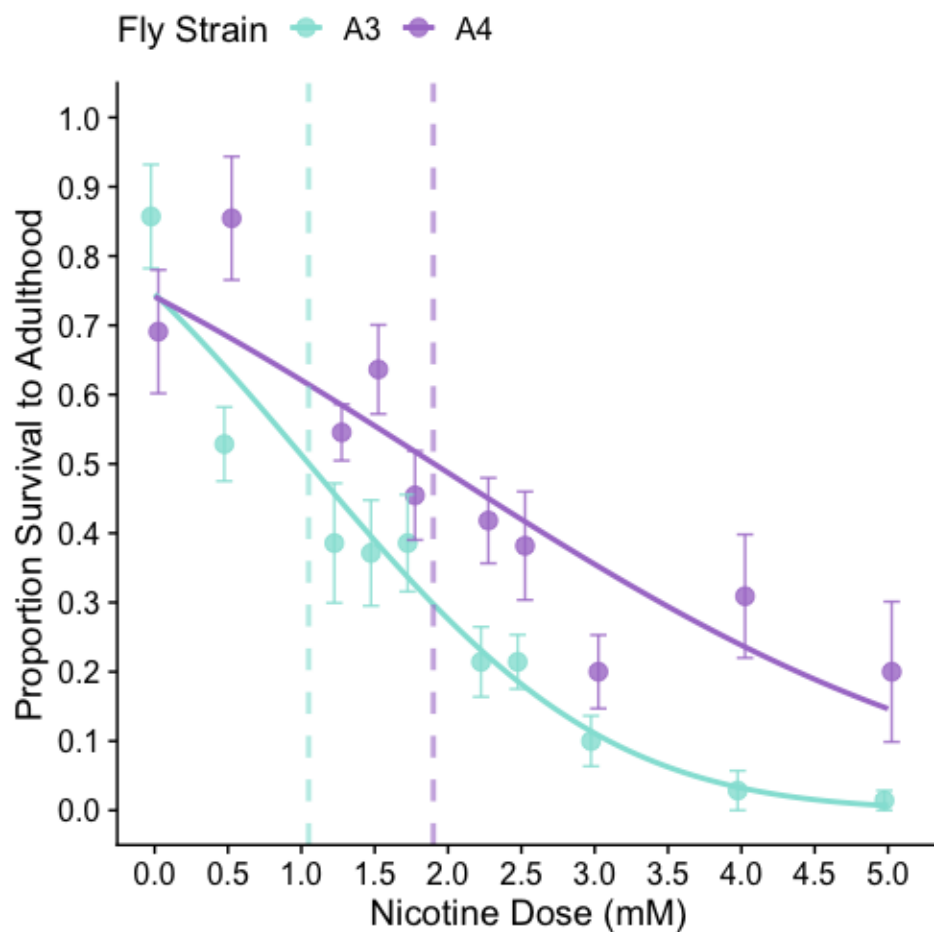

289

290 **Figure 1.** Nicotine concentration-survival curve for DSPR A3 and A4 *Drosophila melanogaster*.  
291 Vertical dashed lines represent estimated LC50 of each strain.

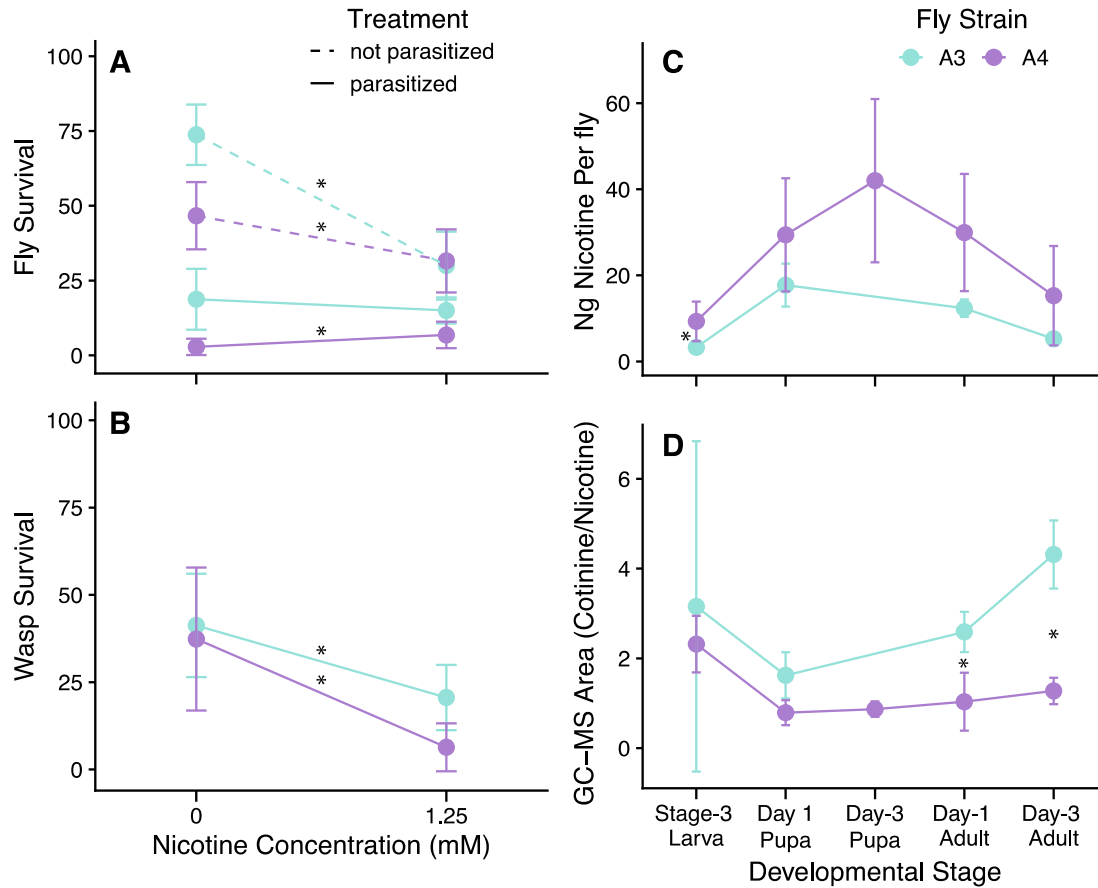

292

293 **Figure 2. A)** In unparasitized flies, nicotine consumption significantly decreases survival in A3  
 294 and A4 flies. When parasitized, nicotine consumption increases A4 but not A3 survival against  
 295 parasitism. **B)** Nicotine consumption by A4 and A3 *Drosophila melanogaster* significantly  
 296 decreases *Leptopilina heterotoma* survival. **C)** When fed nicotine-treated media, DSPR A3 and  
 297 A4 *Drosophila melanogaster* accumulate nicotine across developmental stages. Larval nicotine  
 298 values were significantly higher in A4 than in A3. **D)** A3 flies produced higher levels of the  
 299 metabolite cotinine relative to accumulated nicotine as compared to A4 flies. Lines connect  
 300 estimated means for each treatment; error bars indicate standard deviation; asterisks indicate  
 301 significantly different survival (at  $p < 0.05$ ) on nicotine versus control treatments for panels A  
 302 and B and significantly different estimates of nicotine or cotinine-to-nicotine ratios between fly  
 303 strains in panels C and D.

304
